# Supplementary material
Source: publisher figshare collection journal article supplement (https://acs.figshare.com/ndownloader/files/21787314)
Supplement: Supplementary file 1 [file 21787314]

# **The Combination of Charge and Energy Transfer Processes in MOF for Efficient Photocatalytic Oxidative Coupling of Amines**

*Feng-Juan Zhao,<sup>†,‡</sup> Guoliang Zhang,<sup>§</sup> Zhanfeng Ju,<sup>†</sup> Yan-Xi Tan,<sup>\*,†</sup> and Daqiang Yuan<sup>\*,†,‡</sup>*

<sup>†</sup>State Key Laboratory of Structural Chemistry, Fujian Institute of Research on the Structure of Matter, Chinese Academy of Sciences, Fuzhou, 350002, Fujian, China.

<sup>‡</sup>Fujian Normal University, Cangshan Campus, No.8 Shangsang Road, Cangshan District, Fuzhou, 350007, Fujian, China.

<sup>§</sup>School of mechanical engineering, Tianjin University of Technology and Education, Tianjin, 300222, China

E-mail: [tyx@fjirsm.ac.cn](mailto:tyx@fjirsm.ac.cn); [ydq@fjirsm.ac.cn](mailto:ydq@fjirsm.ac.cn)

**X-ray crystallography:** Single-crystal X-ray diffraction data were collected on a SuperNova diffractometer equipped with a Cu K $\alpha$  radiation ( $\lambda = 1.5406 \text{ \AA}$ ) and an Atlas CCD detector under 150 K. The structures were solved by using the direct method and refined by full-matrix least-squares methods on  $F^2$  by using the SHELX-2017 program package. All non-hydrogen atoms were refined anisotropically. In order to obtain a clear structure, we used the *SQUEEZE* instruction of *PLATON* to remove the contribution of disordered guest molecules and refined further using the data generated.

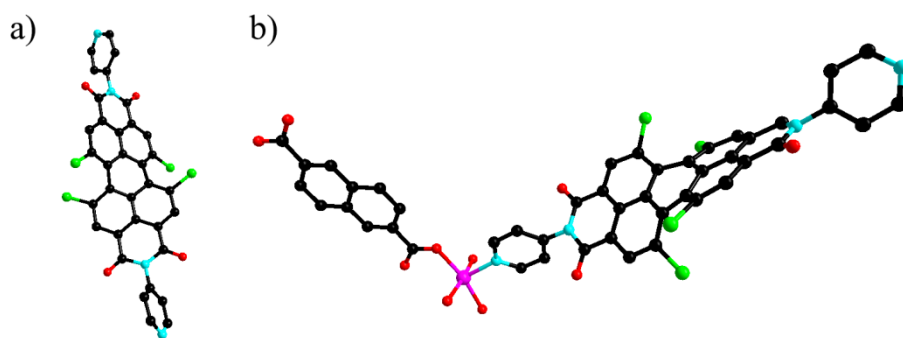

Figure. S1. (a) The structure of *bis(N-pyridyl) tetrachloroperylene peryleneimide (L)* and (b) the structure of **FJI-Y10** asymmetric unit.

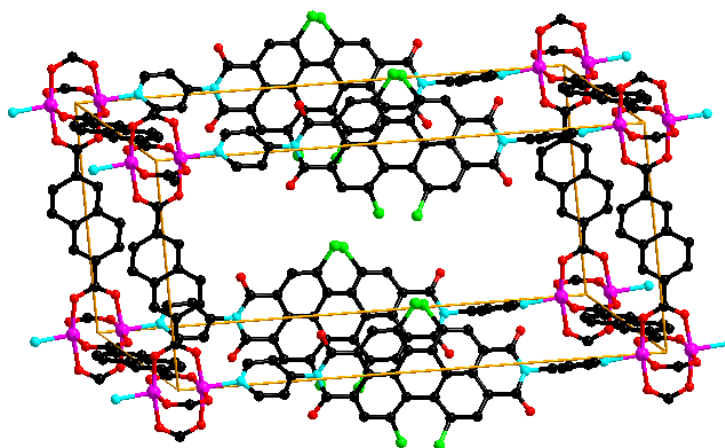

Figure. S2. The internal framework Co...Co distance is up to 13.0769-23.6816  $\text{\AA}$ .

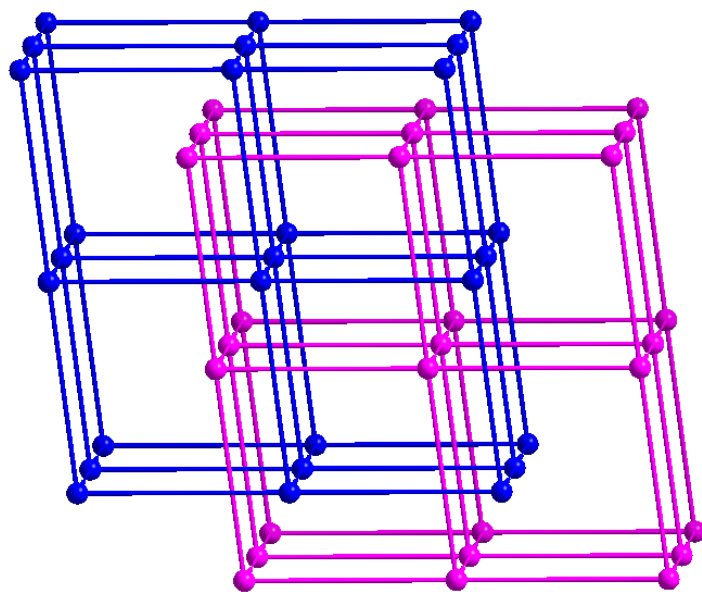

Figure. S3. The 6-connected *pcu* net of **FJI-Y10**.

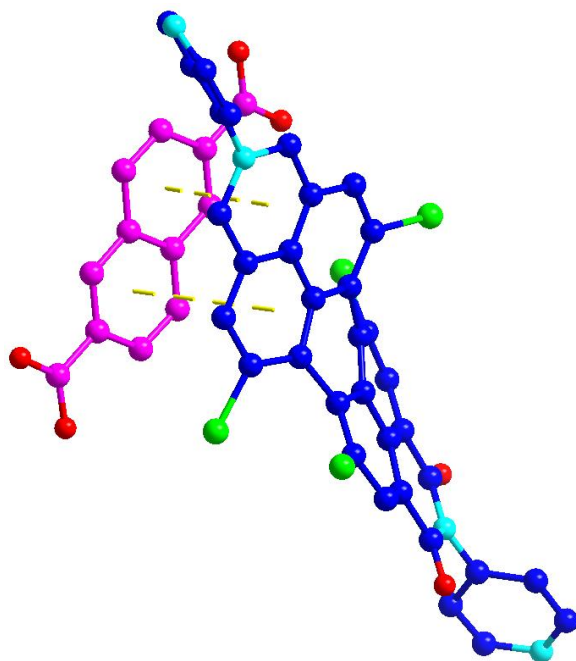

Figure. S4. There are face-to-face  $\pi \cdots \pi$  stacking with the distance of 3.5187 to 3.7444 Å between the phenyl rings of **L** and 2,6-NDC ligands from different *pcu* lattices.

## 1. Gas adsorption

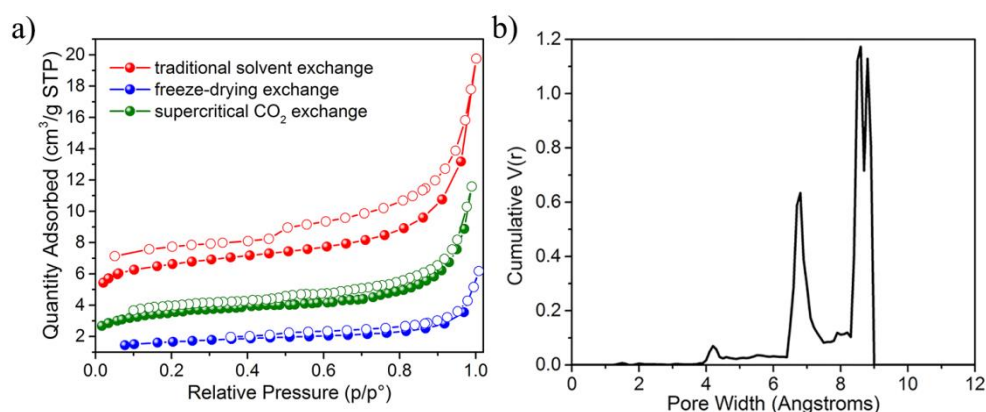

Figure. S5. (a)  $N_2$  sorption measurements at 77 K for **FJI-Y10** by adopting traditional solvent ( $CH_3CN$ ) exchange (red) and freeze-drying (blue) and supercritical  $CO_2$  exchange (green). (b) The pore size distribution of **FJI-Y10** simulated by Zeo++.

## 2. PXRD

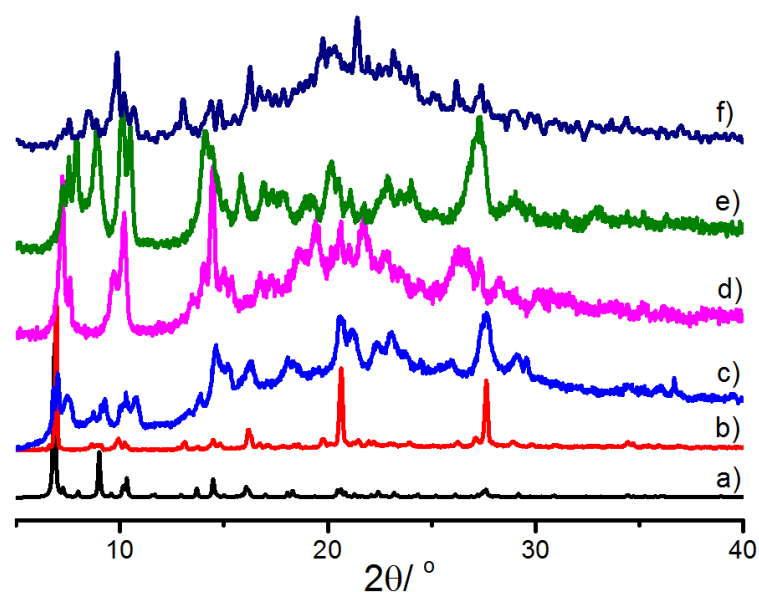

Figure. S6. PXRD patterns of **FJI-Y10**: simulate one (a), as-synthesized sample (b), sample after catalysis (c), sample activated by traditional MeCN-exchange (d), sample activated by freeze-drying (e), sample activated by supercritical  $CO_2$  exchange (f).

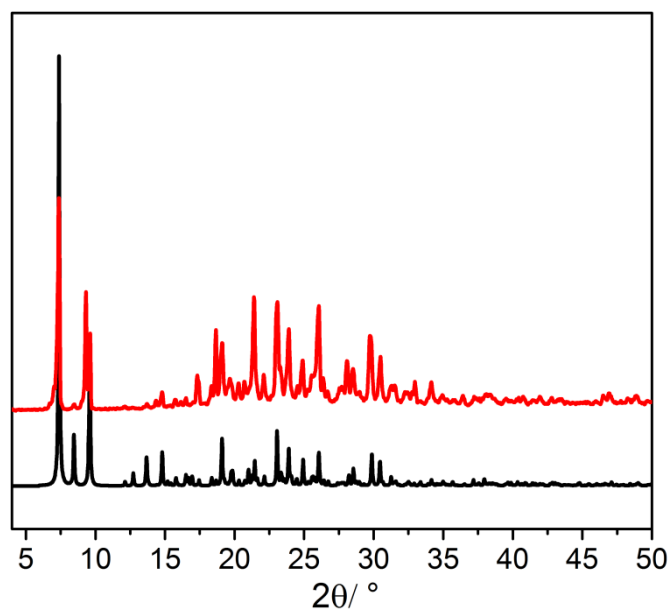

Figure. S7. PXRD patterns of the simulate one (black) and as-synthesized *bis(N-pyridyl) tetrachloroperylene peryleneimide (L)* (red).

### 3. TGA

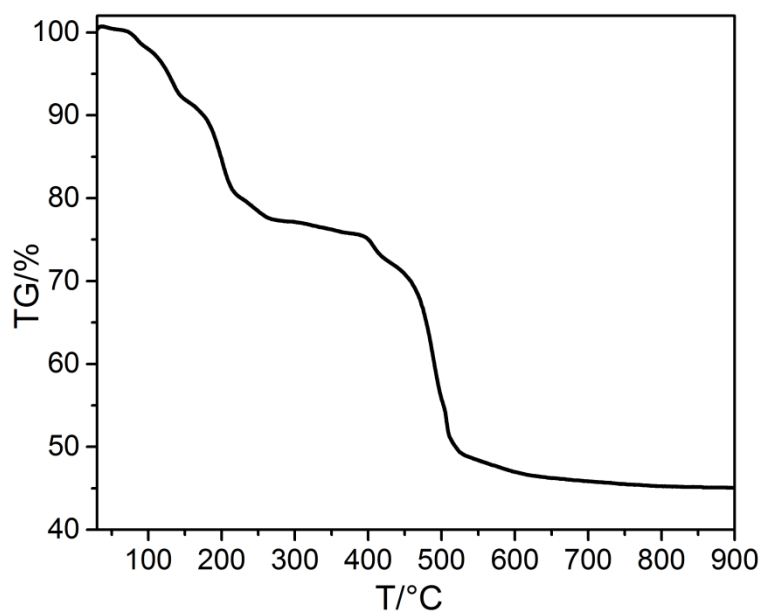

Figure. S8. TGA curve for **FJI-Y10**.

#### 4. UV-Vis

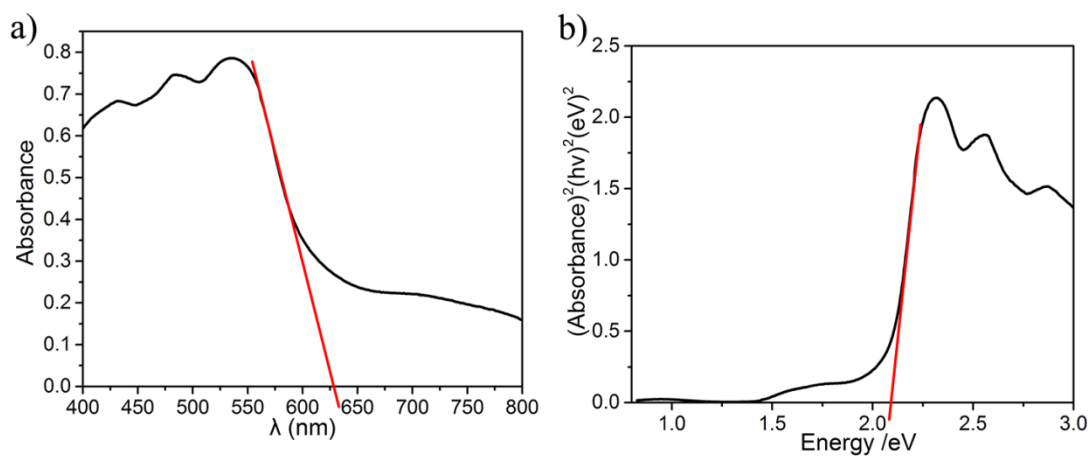

Figure. S9. (a) UV-visible diffuse reflectance spectra of **FJI-Y10** and (b) plot of Kubelka–Munk function for the band-gap determination.

#### 5. EPR

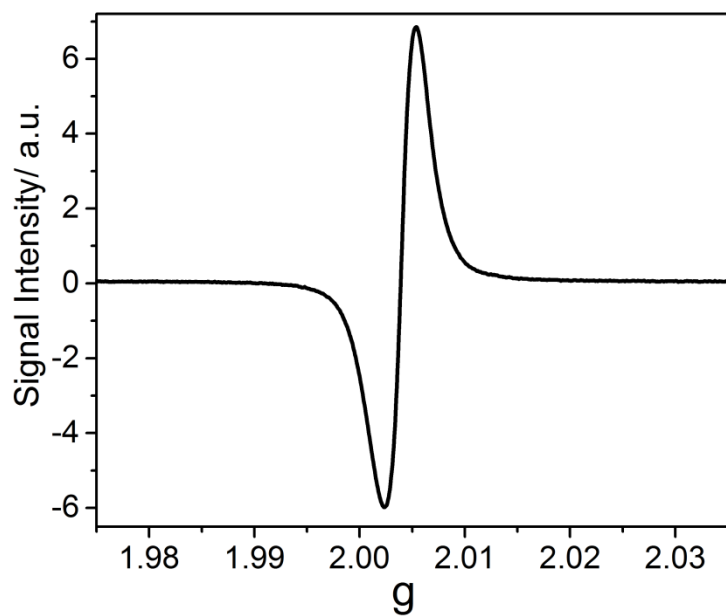

Figure. S10. EPR spectra of *bis(N-pyridyl) tetrachloroperylene peryleneimide (L)*.

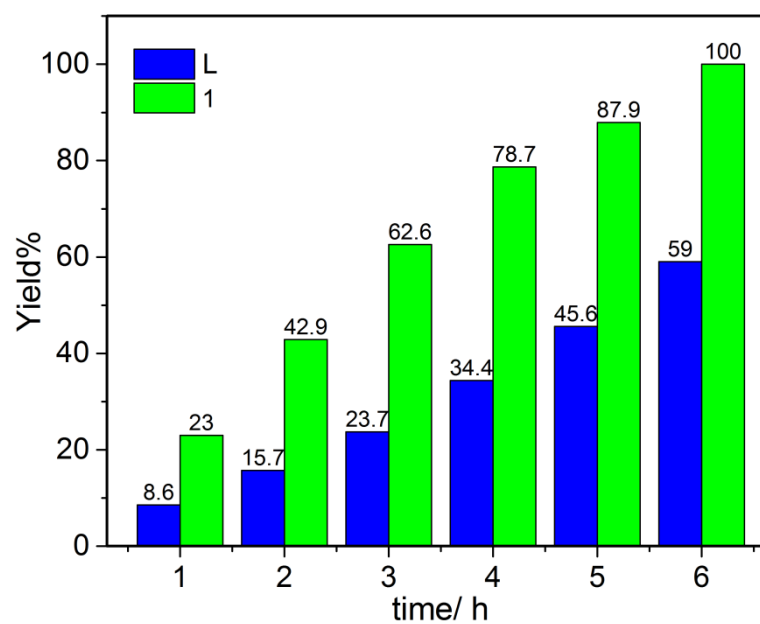

Figure. S11. Comparison of photocatalytic oxidation of benzamine coupling reaction rates of MOF **FJI-Y10** and L under the same test conditions.

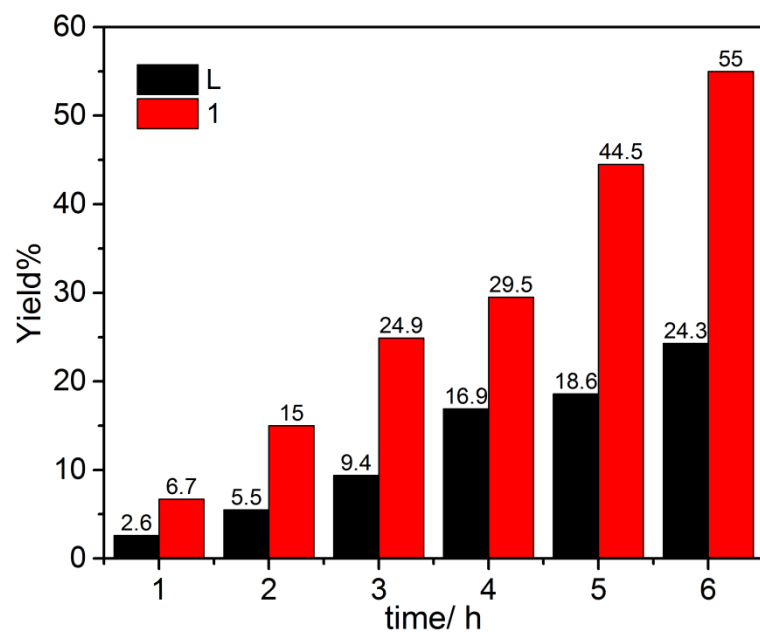

Figure. S12. Comparison of photocatalytic oxidation of heptylamine coupling reaction rates of MOF **FJI-Y10** and L under the same test conditions.

## 6. FT-IR spectra

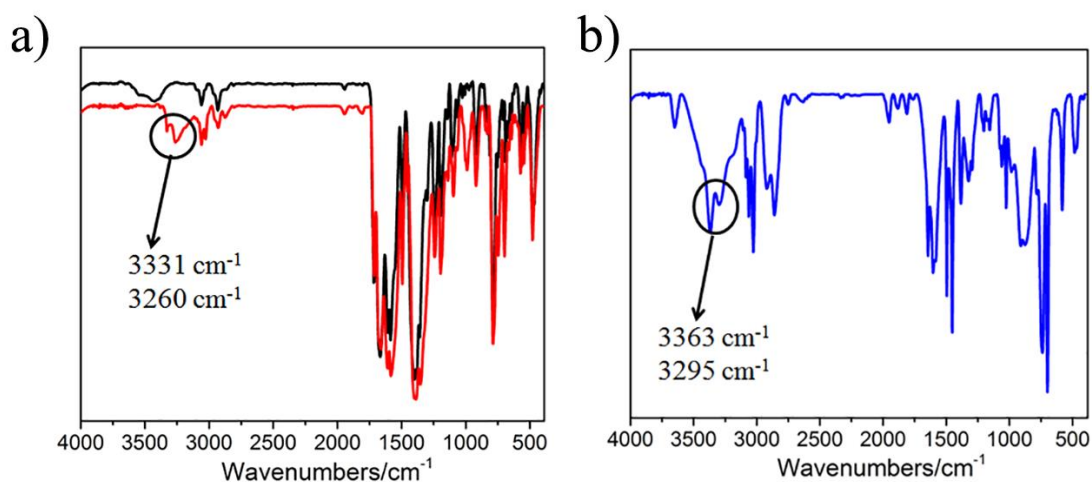

Figure. S13 (a) Infrared IR spectra of **FJI-Y10** (black line) and **FJI-Y10** obtained after the absorption of benzylamine (red line). (b) Infrared IR spectra of benzylamine.

## 7. Mott-Schottky measurements

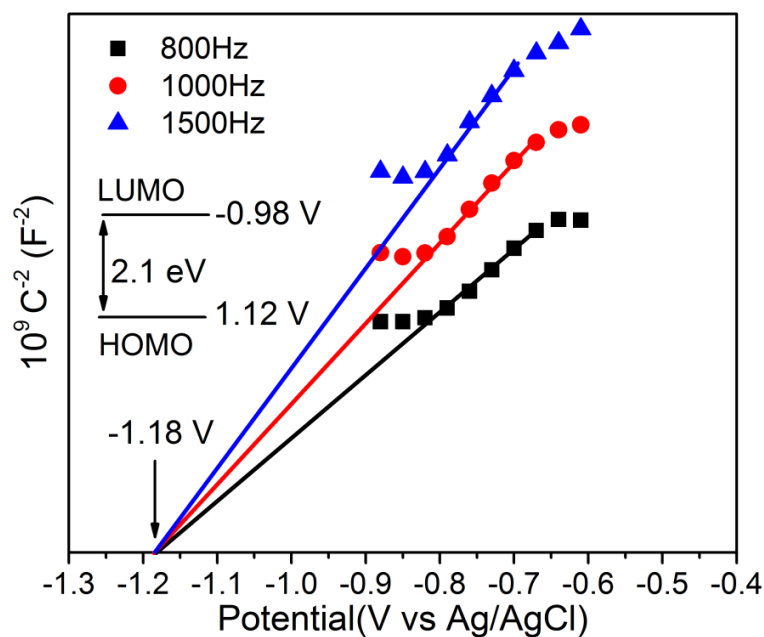

Figure. S14. Mott-Schottky plots for **FJI-Y10** at frequencies of 800, 1000 and 1500 Hz. The positive slope of the obtained  $C^{-2}$  values (vs the applied potentials) is consistent with that of the character of typical n-type semiconductors. (Inset: the HOMO and LUMO levels of **FJI-Y10**)



## 8. Photocurrent measurement

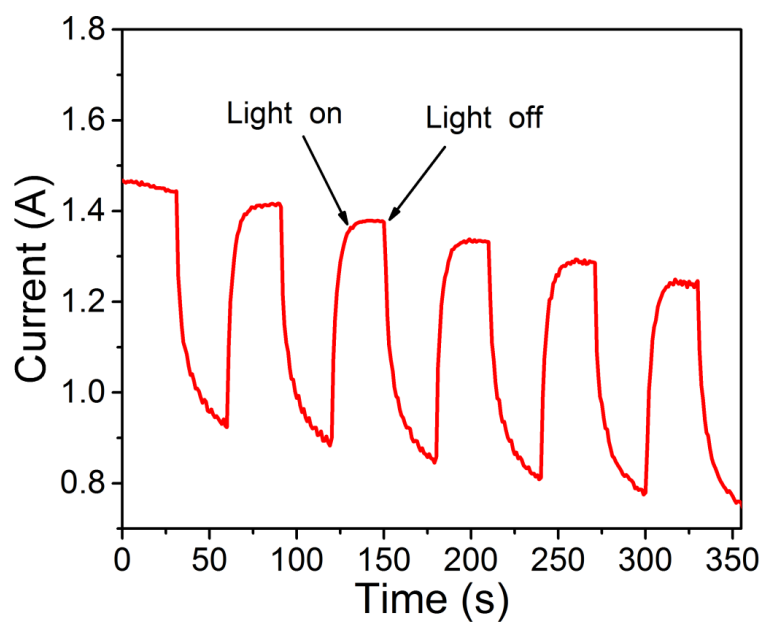

Figure. S15. Photocurrent responses for **FJI-Y10** photocatalysts.

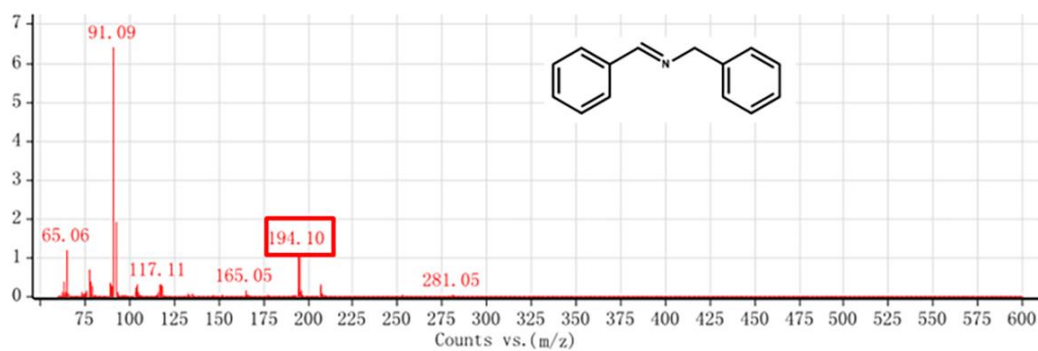

Figure. S16. MS spectrum of the reaction mixture after photo-reduction (entry 1 in Table 2).

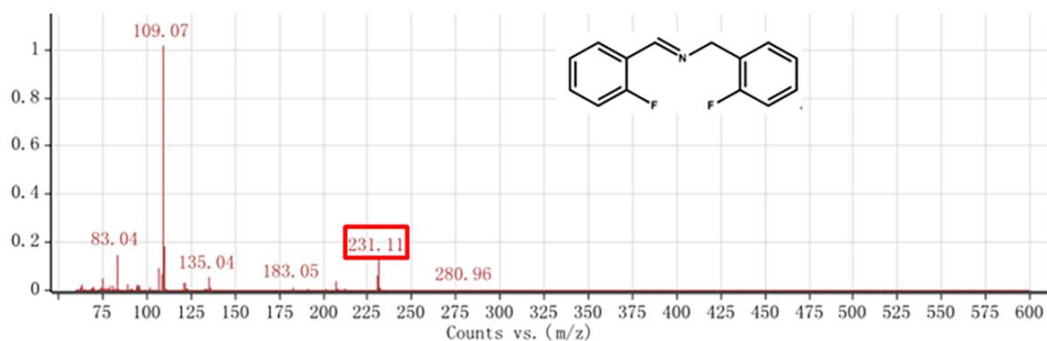

Figure. S17. MS spectrum of the reaction mixture after photo-reduction (entry 2 in Table 2).

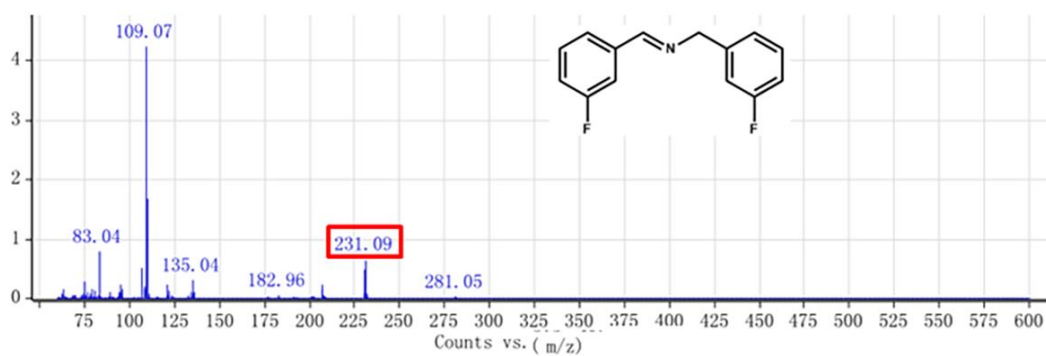

Figure. S18. MS spectrum of the reaction mixture after photo-reduction (entry 3 in Table 2).

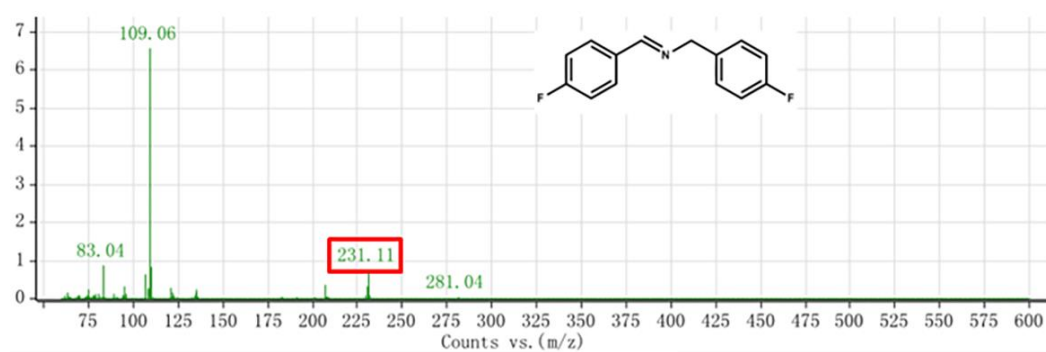

Figure. S19. MS spectrum of the reaction mixture after photo-reduction (entry 4 in Table 2).

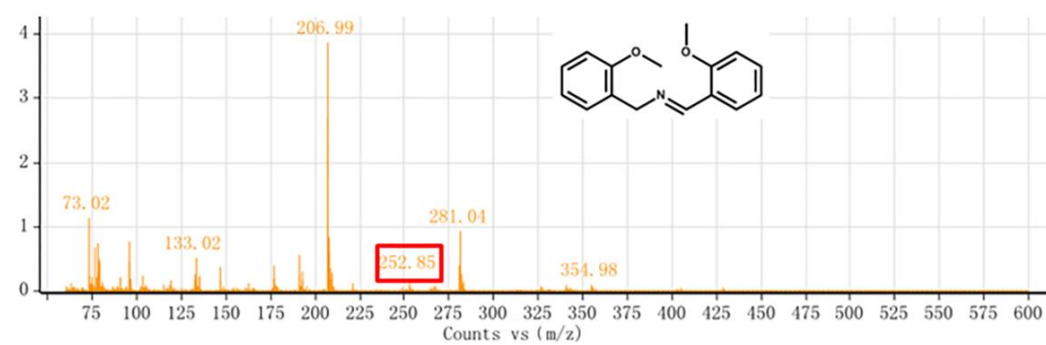

Figure. S20. MS spectrum of the reaction mixture after photo-reduction (entry 5 in Table 2).

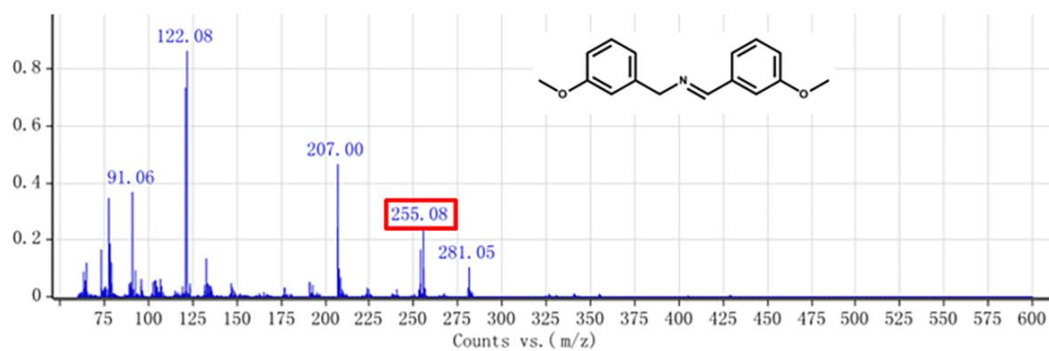

Figure. S21. MS spectrum of the reaction mixture after photo-reduction (entry 6 in Table 2).

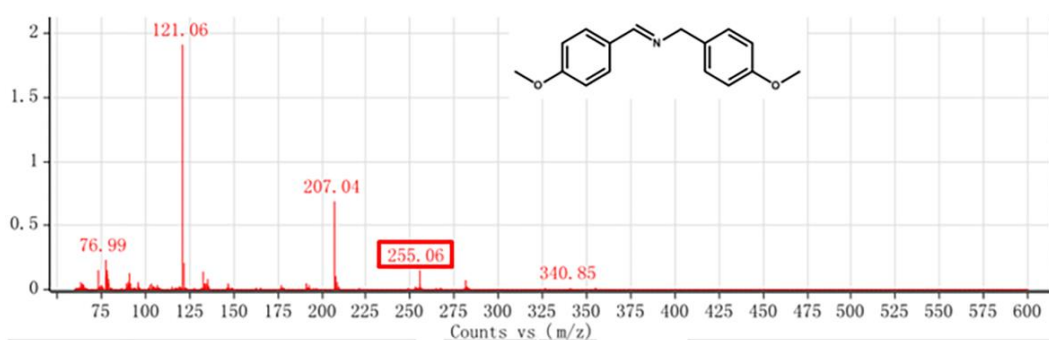

Figure. S22. MS spectrum of the reaction mixture after photo-reduction (entry 7 in Table 2).

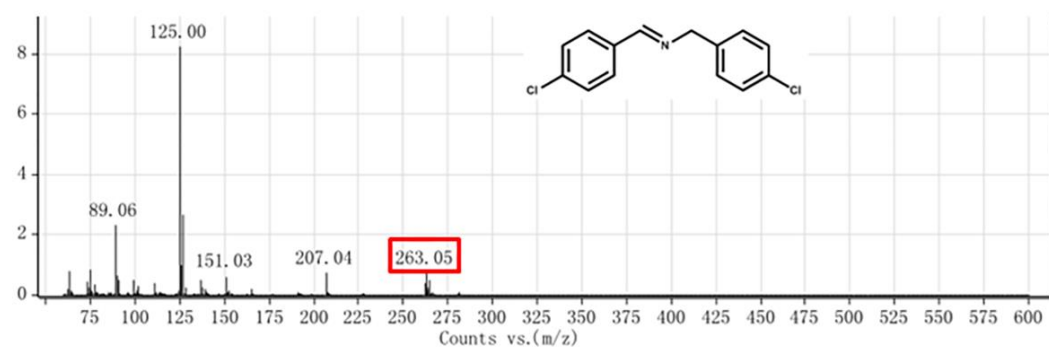

Figure. S23. MS spectrum of the reaction mixture after photo-reduction (entry 8 in Table 2).

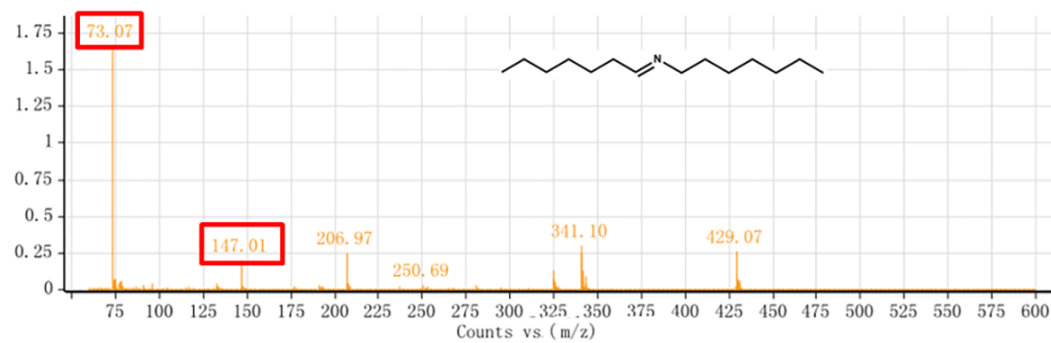

Figure. S24. MS spectrum of the reaction mixture after photo-reduction (entry 9 in Table 2).
